# Supplementary material for: The Impact of Delays During the Pandemic Months on Survival of Lung Cancer Patients in Canada in 2020.
Source: Research Square preprint supplement (doi:10.21203/rs.3.rs-862115/v1), 2021-09-27
Supplement: Supplementary file 2 [file 2322d5d9cdd6e727d600a842.xlsx]

## Sheet: Main
		Lung Cancer Model, Canada
		Population
		Source:Statistics Canada,https://www150.statcan.gc.ca/	2000	2001	2002	2003	2004	2005	2006	2007	2008	2009	2010	2011	2012	2013	2014	2015	2016	2017	2018	2019	2020
		All ages	30685730	31020902	31360079	31644028	31940655	32243753	32571174	32889025	33247118	33628895	34004889	34339328	34714222	35082954	35437435	35702908	36109487	36545295	37065178	37593384	38005238
			2000	2001	2002	2003	2004	2005	2006	2007	2008	2009	2010	2011	2012	2013	2014	2015	2016	2017	2018	2019	2020
	Female	total	15491918	15654302	15822503	15964718	16113565	16263745	16426415	16590173	16772940	16965482	17157066	17324800	17504322	17681789	17855738	17990107	18192991	18409073	18658841	18914877	19119977
		< 45	9674501	9677438	9674040	9645887	9625601	9605737	9586110	9579108	9585521	9604969	9632269	9665158	9708321	9748618	9787938	9798649	9867396	9960207	10092916	10225784	10314464
		45–54	2191145	2261493	2312554	2365666	2420488	2477310	2535044	2586793	2636434	2674148	2694724	2691350	2680690	2661913	2641832	2615956	2588206	2549484	2504211	2464762	2437018
		55–64	1423149	1477289	1563747	1645409	1722208	1797259	1870068	1937637	2004268	2075348	2151565	2215872	2267224	2328343	2391305	2454463	2518286	2571593	2621186	2660150	2680254
		65–74	1138295	1141982	1146248	1152985	1164929	1175561	1196722	1222988	1258875	1302052	1345304	1397594	1473102	1547980	1617103	1684863	1751763	1823386	1893953	1970455	2049023
		75–84	781429	803015	823325	843567	859937	871593	881745	888787	896063	899822	906499	913517	919343	926917	938449	948105	965145	990361	1023079	1061885	1100663
		85+	186940	293085	302589	311204	320402	336285	356726	374860	391779	409143	426705	441309	455642	468018	479111	488071	502195	514042	523496	531841	538555
			2000	2001	2002	2003	2004	2005	2006	2007	2008	2009	2010	2011	2012	2013	2014	2015	2016	2017	2018	2019	2020
	Male	total	15193812	15366600	15537576	15679310	15827090	15980008	16144759	16298852	16474178	16663413	16847823	17014528	17209900	17401165	17581697	17712801	17916496	18136222	18406337	18678507	18885261
		< 45	9990647	10007114	10010483	9983945	9963216	9942056	9919611	9890795	9875280	9877827	9886733	9905074	9965045	10024168	10079010	10094977	10176431	10282329	10443504	10605159	10709740
		45–54	2168977	2235354	2285083	2338361	2395297	2456848	2520510	2583110	2645931	2694083	2719843	2719679	2703300	2676430	2648361	2613210	2577476	2533501	2483484	2437526	2403013
		55–64	1386058	1440365	1524788	1604049	1677496	1750550	1820925	1890203	1958568	2033195	2115740	2186960	2234705	2290499	2346663	2403416	2460724	2513153	2564316	2604933	2624883
		65–74	1008705	1019592	1027976	1036953	1050314	1062409	1084870	1110762	1146698	1189444	1233710	1287253	1365522	1441272	1509447	1575853	1640605	1705995	1767896	1834909	1904874
		75–84	518870	539063	559891	582072	602034	620436	639006	653570	667664	679111	691969	706153	720192	736096	753882	769926	791735	818977	853111	891364	929010
		85+	88469	125112	129355	133930	138733	147709	159837	170412	180037	189753	199828	209409	221136	232700	244334	255419	269525	282267	294026	304616	313741
		Incidence and Mortality Rates per 100,000(Mortality :2013 to 2017, Incidence:2012-2016)
		Source:Canadian Cancer Statistics,A 2020 special report on lung cancer	Incidence, males per 100,000	Mortality, males per 100,000	Incidence, females per 100,000	Mortality, females per 100,000
		< 45	1.00882	0.44353	1.2446	0.572798
		45–54	23.8726	13.9765	29.5525	15.3721
		55–64	109.622	71.2062	108.054	63.2222
		65–74	288.454	200.484	254.237	162.317
		75–84	477.702	387.902	354.482	277.412
		85+	483.32	491.72	255.3	276.917
		Incidence
			2000	2001	2002	2003	2004	2005	2006	2007	2008	2009	2010	2011	2012	2013	2014	2015	2016	2017	2018	2019	2020
		Females
		< 45	120.409	120.446	120.404	120.053	119.801	119.553	119.309	119.222	119.302	119.544	119.884	120.293	120.83	121.332	121.821	121.954	122.81	123.965	125.617	127.271	128.374
		45–54	647.538	668.328	683.417	699.113	715.315	732.107	749.169	764.462	779.132	790.278	796.358	795.361	792.211	786.662	780.727	773.08	764.88	753.436	740.057	728.399	720.2
		55–64	1537.77	1596.27	1689.69	1777.93	1860.91	1942.01	2020.68	2093.69	2165.69	2242.49	2324.85	2394.34	2449.82	2515.87	2583.9	2652.14	2721.11	2778.71	2832.29	2874.4	2896.12
		65–74	2893.97	2903.34	2914.19	2931.31	2961.68	2988.71	3042.51	3109.29	3200.52	3310.3	3420.26	3553.2	3745.17	3935.54	4111.27	4283.54	4453.63	4635.72	4815.13	5009.62	5209.37
		75–84	2770.03	2846.54	2918.54	2990.29	3048.32	3089.64	3125.63	3150.59	3176.38	3189.71	3213.38	3238.25	3258.91	3285.76	3326.63	3360.86	3421.27	3510.65	3626.63	3764.19	3901.65
		85+	477.258	748.246	772.51	794.504	817.987	858.536	910.722	957.018	1000.21	1044.54	1089.38	1126.66	1163.25	1194.85	1223.17	1246.05	1282.1	1312.35	1336.49	1357.79	1374.93
			2000	2001	2002	2003	2004	2005	2006	2007	2008	2009	2010	2011	2012	2013	2014	2015	2016	2017	2018	2019	2020
		Males
		< 45	100.788	100.954	100.988	100.72	100.511	100.298	100.071	99.7806	99.6241	99.6498	99.7397	99.9247	100.53	101.126	101.679	101.84	102.662	103.731	105.356	106.987	108.042
		45–54	517.791	533.637	545.509	558.228	571.82	586.514	601.712	616.656	631.653	643.148	649.298	649.258	645.348	638.934	632.233	623.841	615.311	604.813	592.872	581.901	573.662
		55–64	1519.43	1578.96	1671.51	1758.39	1838.91	1918.99	1996.14	2072.08	2147.02	2228.83	2319.32	2397.39	2449.73	2510.89	2572.46	2634.68	2697.5	2754.97	2811.06	2855.58	2877.45
		65–74	2909.65	2941.06	2965.24	2991.13	3029.67	3064.56	3129.35	3204.04	3307.7	3431	3558.69	3713.14	3938.91	4157.41	4354.06	4545.61	4732.39	4921.01	5099.57	5292.87	5494.69
		75–84	2478.65	2575.11	2674.61	2780.57	2875.93	2963.84	3052.54	3122.12	3189.44	3244.13	3305.55	3373.31	3440.37	3516.35	3601.31	3677.95	3782.13	3912.27	4075.33	4258.06	4437.9
		85+	427.589	604.692	625.199	647.311	670.525	713.907	772.524	823.636	870.155	917.115	965.809	1012.12	1068.79	1124.69	1180.92	1234.49	1302.67	1364.25	1421.09	1472.27	1516.37
		Mortality
			2000	2001	2002	2003	2004	2005	2006	2007	2008	2009	2010	2011	2012	2013	2014	2015	2016	2017	2018	2019	2020
		Females
		< 45	55.4153	55.4322	55.4127	55.2514	55.1352	55.0215	54.909	54.8689	54.9057	55.0171	55.1734	55.3618	55.609	55.8399	56.0651	56.1264	56.5202	57.0518	57.812	58.5731	59.081
		45–54	336.825	347.639	355.488	363.652	372.08	380.815	389.689	397.644	405.275	411.073	414.236	413.717	412.078	409.192	406.105	402.127	397.862	391.909	384.95	378.886	374.621
		55–64	899.747	933.975	988.636	1040.26	1088.82	1136.27	1182.3	1225.02	1267.14	1312.08	1360.27	1400.92	1433.39	1472.03	1511.84	1551.77	1592.12	1625.82	1657.17	1681.81	1694.52
		65–74	1847.65	1853.63	1860.56	1871.49	1890.88	1908.14	1942.48	1985.12	2043.37	2113.45	2183.66	2268.53	2391.1	2512.63	2624.83	2734.82	2843.41	2959.67	3074.21	3198.38	3325.91
		75–84	2167.78	2227.66	2284.01	2340.16	2385.57	2417.91	2446.07	2465.61	2485.79	2496.22	2514.74	2534.21	2550.37	2571.38	2603.37	2630.16	2677.43	2747.38	2838.15	2945.8	3053.38
		85+	517.668	811.602	837.92	861.777	887.247	931.23	987.835	1038.05	1084.9	1132.99	1181.62	1222.06	1261.75	1296.02	1326.74	1351.55	1390.66	1423.47	1449.65	1472.76	1491.35
			2000	2001	2002	2003	2004	2005	2006	2007	2008	2009	2010	2011	2012	2013	2014	2015	2016	2017	2018	2019	2020
		Males
		< 45	44.3115	44.3845	44.3995	44.2818	44.1898	44.096	43.9964	43.8686	43.7998	43.8111	43.8506	43.9319	44.1979	44.4602	44.7034	44.7742	45.1355	45.6052	46.32	47.037	47.5009
		45–54	303.147	312.424	319.375	326.821	334.779	343.381	352.279	361.028	369.808	376.538	380.139	380.116	377.827	374.071	370.148	365.235	360.241	354.095	347.104	340.681	335.857
		55–64	986.96	1025.63	1085.74	1142.18	1194.48	1246.5	1296.61	1345.94	1394.62	1447.76	1506.54	1557.25	1591.25	1630.98	1670.97	1711.38	1752.19	1789.52	1825.95	1854.87	1869.08
		65–74	2022.3	2044.12	2060.93	2078.93	2105.72	2129.96	2174.99	2226.9	2298.95	2384.65	2473.4	2580.74	2737.66	2889.52	3026.21	3159.34	3289.16	3420.25	3544.36	3678.71	3818.97
		75–84	2012.7	2091.03	2171.83	2257.87	2335.3	2406.68	2478.71	2535.21	2589.88	2634.28	2684.16	2739.18	2793.64	2855.33	2924.32	2986.56	3071.15	3176.82	3309.23	3457.61	3603.64
		85+	435.019	615.2	636.064	658.56	682.177	726.314	785.95	837.949	885.277	933.053	982.593	1029.7	1087.37	1144.23	1201.44	1255.95	1325.31	1387.96	1445.78	1497.86	1542.73
		Summary																							29238.8
																									21216.6
			2000	2001	2002	2003	2004	2005	2006	2007	2008	2009	2010	2011	2012	2013	2014	2015	2016	2017	2018	2019	2020
	Females	Incidence	8446.97	8883.17	9098.75	9313.21	9524.02	9730.56	9968.02	10194.3	10441.2	10696.9	10964.1	11228.1	11530.2	11840	12147.5	12437.6	12765.8	13114.8	13476.2	13861.7	14230.7	219663	438871
	Females	Mortality	5825.08	6229.94	6382.02	6532.6	6679.73	6829.38	7003.29	7166.3	7341.39	7520.83	7709.69	7894.8	8104.29	8317.1	8528.95	8726.55	8958	9205.3	9461.94	9736.21	9998.86	154153	316543	0.721267
	Males	Incidence	7953.9	8334.41	8583.05	8836.36	9087.37	9348.11	9652.34	9938.31	10245.6	10563.9	10898.4	11245.1	11643.7	12049.4	12442.7	12818.4	13232.7	13661.1	14105.3	14567.7	15008.1	219208
	Males	Mortality	5804.44	6132.79	6318.34	6508.64	6696.64	6896.94	7132.55	7350.9	7582.34	7820.1	8070.68	8330.92	8631.94	8938.59	9237.79	9523.23	9843.18	10174.3	10518.7	10876.8	11217.8	162390
		Projection
			2021
	Females	Incidence	14189.6
	Females	Mortality	9977.53
	Males	Incidence	14978.7
	Males	Mortality	11179.8
		Stage-wise rates per 100,000
		Source:Canadian Cancer Statistics,A 2020 special report on lung cancer	Stage 1		Stage 2		Stage 3		Stage 4		Unknown
		All	12.8	(12.6–13.0)	5	(4.9–5.2)	12	(11.8–12.2)	30.5	(30.2–30.8)	1.2	(1.2–1.3)
		Stage-wise total incidence
			2000	2001	2002	2003	2004	2005	2006	2007	2008	2009	2010	2011	2012	2013	2014	2015	2016	2017	2018	2019	2020
		Stage 1	3927.77	3970.68	4014.09	4050.44	4088.4	4127.2	4169.11	4209.8	4255.63	4304.5	4352.63	4395.43	4443.42	4490.62	4535.99	4569.97	4622.01	4677.8	4744.34	4811.95	4864.67
		Stage 2	1534.29	1551.05	1568	1582.2	1597.03	1612.19	1628.56	1644.45	1662.36	1681.44	1700.24	1716.97	1735.71	1754.15	1771.87	1785.15	1805.47	1827.26	1853.26	1879.67	1900.26
		Stage 3	3682.29	3722.51	3763.21	3797.28	3832.88	3869.25	3908.54	3946.68	3989.65	4035.47	4080.59	4120.72	4165.71	4209.95	4252.49	4284.35	4333.14	4385.44	4447.82	4511.21	4560.63
		Stage 4	9359.15	9461.38	9564.82	9651.43	9741.9	9834.34	9934.21	10031.2	10140.4	10256.8	10371.5	10473.5	10587.8	10700.3	10808.4	10889.4	11013.4	11146.3	11304.9	11466	11591.6
		Unknown	368.229	372.251	376.321	379.728	383.288	386.925	390.854	394.668	398.965	403.547	408.059	412.072	416.571	420.995	425.249	428.435	433.314	438.544	444.782	451.121	456.063
		Since the incidence total for male+female does not match with that of stages we will use the stages as a percentage
			2000	2001	2002	2003	2004	2005	2006	2007	2008	2009	2010	2011	2012	2013	2014	2015	2016	2017	2018	2019	2020
		Stage 1	3413.51	3583.5	3680.11	3777.47	3873.59	3970.84	4083.59	4190.2	4305.55	4425	4550.25	4677.36	4823.18	4972.1	5117.96	5256.54	5411.06	5572.87	5740.54	5917	6085.47
		Stage 2	1333.4	1399.8	1437.54	1475.57	1513.12	1551.11	1595.15	1636.8	1681.86	1728.52	1777.44	1827.09	1884.06	1942.23	1999.2	2053.34	2113.7	2176.9	2242.4	2311.33	2377.14
		Stage 3	3200.17	3359.53	3450.11	3541.38	3631.49	3722.67	3828.36	3928.31	4036.46	4148.44	4265.86	4385.02	4521.73	4661.35	4798.09	4928.01	5072.87	5224.56	5381.75	5547.19	5705.13
		Stage 4	8133.76	8538.8	8769.02	9001	9230.04	9461.78	9730.42	9984.45	10259.3	10543.9	10842.4	11145.3	11492.7	11847.6	12195.1	12525.4	12893.5	13279.1	13678.6	14099.1	14500.5
		Unknown	320.017	335.953	345.011	354.138	363.149	372.267	382.836	392.831	403.646	414.844	426.586	438.502	452.173	466.135	479.809	492.801	507.287	522.456	538.175	554.719	570.513
		Stage-wise incidence by sex
		Source:Canadian Cancer Statistics,A 2020 special report on lung cancer	Both sexes		Male		Female
		Stage	%		%		%
		Stage 1	0.21	0.208192	0.18	0.181436	0.24	0.235721
		Stage 2	0.08		0.08	0.082812	0.08	0.0807584
		Stage 3	0.2	0.195097	0.2	0.198498	0.19	0.191713
		Stage 4	0.49	0.494722	0.52	0.516324	0.47	0.472495
		Unknown	0.02	0.0201904	0.02	0.0209305	0.02	0.0193118
		Female	2000	2001	2002	2003	2004	2005	2006	2007	2008	2009	2010	2011	2012	2013	2014	2015	2016	2017	2018	2019	2020
		Stage 1	2027.27	2131.96	2183.7	2235.17	2285.76	2335.33	2392.32	2446.63	2505.9	2567.25	2631.39	2694.75	2767.25	2841.6	2915.41	2985.03	3063.79	3147.56	3234.29	3326.8	3415.36
		Stage 2	675.757	710.654	727.9	745.057	761.921	778.444	797.441	815.542	835.299	855.749	877.128	898.249	922.416	947.2	971.802	995.01	1021.26	1049.19	1078.1	1108.93	1138.45
		Stage 3	1604.92	1687.8	1728.76	1769.51	1809.56	1848.81	1893.92	1936.91	1983.84	2032.4	2083.18	2133.34	2190.74	2249.6	2308.03	2363.15	2425.5	2491.82	2560.48	2633.72	2703.82
		Stage 4	3970.07	4175.09	4276.41	4377.21	4476.29	4573.36	4684.97	4791.31	4907.38	5027.53	5153.13	5277.21	5419.19	5564.8	5709.34	5845.69	5999.92	6163.97	6333.82	6514.99	6688.41
		Unknown	168.939	177.663	181.975	186.264	190.48	194.611	199.36	203.885	208.825	213.937	219.282	224.562	230.604	236.8	242.95	248.753	255.316	262.297	269.524	277.233	284.613
		Male	2000	2001	2002	2003	2004	2005	2006	2007	2008	2009	2010	2011	2012	2013	2014	2015	2016	2017	2018	2019	2020
		Stage 1	1431.7	1500.19	1544.95	1590.54	1635.73	1682.66	1737.42	1788.9	1844.21	1901.5	1961.71	2024.12	2095.86	2168.89	2239.68	2307.31	2381.88	2458.99	2538.95	2622.18	2701.46
		Stage 2	636.312	666.753	686.644	706.908	726.989	747.849	772.187	795.065	819.648	845.11	871.872	899.611	931.495	963.952	995.413	1025.47	1058.61	1092.88	1128.42	1165.41	1200.65
		Stage 3	1590.78	1666.88	1716.61	1767.27	1817.47	1869.62	1930.47	1987.66	2049.12	2112.77	2179.68	2249.03	2328.74	2409.88	2488.53	2563.68	2646.53	2732.21	2821.05	2913.54	3001.62
		Stage 4	4136.03	4333.89	4463.19	4594.91	4725.43	4861.02	5019.22	5167.92	5327.71	5493.21	5667.17	5847.47	6054.71	6265.69	6470.18	6665.58	6880.99	7103.75	7334.74	7575.19	7804.22
		Unknown	159.078	166.688	171.661	176.727	181.747	186.962	193.047	198.766	204.912	211.277	217.968	224.903	232.874	240.988	248.853	256.368	264.653	273.221	282.105	291.354	300.162
		Month of Diagnosis
		Source:United States Cancer Statistics (USCS),https://www.cdc.gov/cancer/uscs/public-use/dictionary/month-of-diagnosis.htm	January	February	March	April	May	June	July	August	September	October	November	December
		Unadjusted (Not Normalized)	0.088	0.078	0.086	0.084	0.084	0.086	0.082	0.085	0.08	0.085	0.079	0.077
		Adjusted (Normalized)	0.0885312	0.0784708	0.0865191	0.084507	0.084507	0.0865191	0.082495	0.0855131	0.0804829	0.0855131	0.0794769	0.0774648
		Table 1: Monthly cases stage wise in 2020 by sex
	Female		January	February	March	April	May	June	July	August	September	October	November	December
	Stage 1	< 45	2.72763	2.41767	2.66564	2.60365	2.60365	2.66564	2.54166	2.63464	2.47966	2.63464	2.44867	2.38668
	Stage 1	45–54	15.3024	13.5635	14.9546	14.6069	14.6069	14.9546	14.2591	14.7808	13.9113	14.7808	13.7374	13.3896
	Stage 1	55–64	61.5352	54.5426	60.1367	58.7382	58.7382	60.1367	57.3397	59.4374	55.9411	59.4374	55.2419	53.8433
	Stage 1	65–74	110.686	98.1081	108.17	105.655	105.655	108.17	103.139	106.913	100.624	106.913	99.3659	96.8503
	Stage 1	75–84	82.9003	73.4798	81.0162	79.1321	79.1321	81.0162	77.248	80.0742	75.3639	80.0742	74.4219	72.5378
	Stage 1	85+	29.2138	25.8941	28.5499	27.8859	27.8859	28.5499	27.222	28.2179	26.558	28.2179	26.2261	25.5621
	Stage 2	< 45	0.90921	0.805891	0.888546	0.867882	0.867882	0.888546	0.847219	0.878214	0.826555	0.878214	0.816223	0.795559
	Stage 2	45–54	5.10081	4.52117	4.98488	4.86896	4.86896	4.98488	4.75303	4.92692	4.6371	4.92692	4.57914	4.46321
	Stage 2	55–64	20.5117	18.1809	20.0456	19.5794	19.5794	20.0456	19.1132	19.8125	18.647	19.8125	18.414	17.9478
	Stage 2	65–74	36.8954	32.7027	36.0568	35.2183	35.2183	36.0568	34.3798	35.6376	33.5412	35.6376	33.122	32.2834
	Stage 2	75–84	27.6334	24.4933	27.0054	26.3774	26.3774	27.0054	25.7493	26.6914	25.1213	26.6914	24.8073	24.1793
	Stage 2	85+	9.73795	8.63136	9.51663	9.29531	9.29531	9.51663	9.07399	9.40597	8.85268	9.40597	8.74202	8.5207
	Stage 3	< 45	2.15937	1.91399	2.1103	2.06122	2.06122	2.1103	2.01214	2.08576	1.96307	2.08576	1.93853	1.88945
	Stage 3	45–54	12.1144	10.7378	11.8391	11.5638	11.5638	11.8391	11.2884	11.7014	11.0131	11.7014	10.8755	10.6001
	Stage 3	55–64	48.7154	43.1796	47.6082	46.5011	46.5011	47.6082	45.3939	47.0546	44.2867	47.0546	43.7331	42.626
	Stage 3	65–74	87.6265	77.6689	85.635	83.6434	83.6434	85.635	81.6519	84.6392	79.6604	84.6392	78.6647	76.6732
	Stage 3	75–84	65.6294	58.1715	64.1379	62.6463	62.6463	64.1379	61.1547	63.3921	59.6631	63.3921	58.9173	57.4258
	Stage 3	85+	23.1276	20.4995	22.602	22.0764	22.0764	22.602	21.5507	22.3392	21.0251	22.3392	20.7623	20.2367
	Stage 4	< 45	5.34161	4.73461	5.22021	5.09881	5.09881	5.22021	4.97741	5.15951	4.85601	5.15951	4.79531	4.67391
	Stage 4	45–54	29.9673	26.5619	29.2862	28.6051	28.6051	29.2862	27.924	28.9457	27.243	28.9457	26.9024	26.2214
	Stage 4	55–64	120.507	106.813	117.768	115.029	115.029	117.768	112.29	116.398	109.551	116.398	108.182	105.443
	Stage 4	65–74	216.76	192.128	211.834	206.907	206.907	211.834	201.981	209.371	197.055	209.371	194.592	189.665
	Stage 4	75–84	162.346	143.898	158.657	154.967	154.967	158.657	151.277	156.812	147.588	156.812	145.743	142.053
	Stage 4	85+	57.2104	50.7092	55.9102	54.61	54.61	55.9102	53.3097	55.2601	52.0095	55.2601	51.3594	50.0591
					1206.6	1178.54	1178.54
	Male		January	February	March	April	May	June	July	August	September	October	November	December
	Stage 1	< 45	1.72172	1.52607	1.68259	1.64346	1.64346	1.68259	1.60433	1.66303	1.5652	1.66303	1.54564	1.50651
	Stage 1	45–54	9.14165	8.10283	8.93389	8.72612	8.72612	8.93389	8.51836	8.83001	8.3106	8.83001	8.20671	7.99895
	Stage 1	55–64	45.854	40.6433	44.8119	43.7697	43.7697	44.8119	42.7276	44.2908	41.6854	44.2908	41.1644	40.1222
	Stage 1	65–74	87.5612	77.6111	85.5712	83.5812	83.5812	85.5712	81.5912	84.5762	79.6011	84.5762	78.6061	76.6161
	Stage 1	75–84	70.7206	62.6842	69.1134	67.5061	67.5061	69.1134	65.8988	68.3097	64.2915	68.3097	63.4879	61.8806
	Stage 1	85+	24.1643	21.4184	23.6152	23.066	23.066	23.6152	22.5168	23.3406	21.9676	23.3406	21.693	21.1438
	Stage 2	< 45	0.765209	0.678254	0.747818	0.730427	0.730427	0.747818	0.713036	0.739123	0.695645	0.739123	0.686949	0.669558
	Stage 2	45–54	4.06296	3.60126	3.97062	3.87828	3.87828	3.97062	3.78594	3.92445	3.6936	3.92445	3.64743	3.55509
	Stage 2	55–64	20.3796	18.0637	19.9164	19.4532	19.4532	19.9164	18.99	19.6848	18.5269	19.6848	18.2953	17.8321
	Stage 2	65–74	38.9161	34.4938	38.0317	37.1472	37.1472	38.0317	36.2627	37.5894	35.3783	37.5894	34.9361	34.0516
	Stage 2	75–84	31.4314	27.8596	30.717	30.0027	30.0027	30.717	29.2883	30.3599	28.574	30.3599	28.2168	27.5025
	Stage 2	85+	10.7397	9.51929	10.4956	10.2515	10.2515	10.4956	10.0075	10.3736	9.76337	10.3736	9.64133	9.39724
	Stage 3	< 45	1.91302	1.69563	1.86955	1.82607	1.82607	1.86955	1.78259	1.84781	1.73911	1.84781	1.71737	1.6739
	Stage 3	45–54	10.1574	9.00314	9.92654	9.69569	9.69569	9.92654	9.46484	9.81112	9.23399	9.81112	9.11857	8.88772
	Stage 3	55–64	50.9489	45.1592	49.7909	48.633	48.633	49.7909	47.4751	49.212	46.3172	49.212	45.7382	44.5803
	Stage 3	65–74	97.2903	86.2346	95.0791	92.868	92.868	95.0791	90.6568	93.9736	88.4457	93.9736	87.3401	85.129
	Stage 3	75–84	78.5785	69.6491	76.7926	75.0067	75.0067	76.7926	73.2209	75.8997	71.435	75.8997	70.5421	68.7562
	Stage 3	85+	26.8493	23.7982	26.2391	25.6288	25.6288	26.2391	25.0186	25.934	24.4084	25.934	24.1033	23.4931
	Stage 4	< 45	4.97386	4.40865	4.86082	4.74778	4.74778	4.86082	4.63473	4.8043	4.52169	4.8043	4.46517	4.35213
	Stage 4	45–54	26.4092	23.4082	25.809	25.2088	25.2088	25.809	24.6086	25.5089	24.0084	25.5089	23.7083	23.1081
	Stage 4	55–64	132.467	117.414	129.456	126.446	126.446	129.456	123.435	127.951	120.425	127.951	118.919	115.909
	Stage 4	65–74	252.955	224.21	247.206	241.457	241.457	247.206	235.708	244.331	229.959	244.331	227.084	221.335
	Stage 4	75–84	204.304	181.088	199.661	195.018	195.018	199.661	190.374	197.339	185.731	197.339	183.409	178.766
	Stage 4	85+	69.8081	61.8754	68.2216	66.635	66.635	68.2216	65.0485	67.4283	63.4619	67.4283	62.6686	61.0821
					1272.52	1242.93	1242.93
		Table 2: Survival vs Time Equation (Kaplan Meir Curves)
			Whole clinical pathway delay <130 days		Whole clinical pathway delay >130 days
		Source: Association of diagnostic delays to survival in lung cancer: single center experience, Alanen 2019	Equation	R2	Equation	R2
		Stage 1	y=1		y : { 1 , x<2; 0.93426 , 7>x>=2; 0.85259, x>7}
		Stage 2	y = 0.0008x2 - 0.0409x + 0.9881, y=0.482 after 21 months	R² = 0.9539	y = 0.0004x2 - 0.031x + 1.0715	R² = 0.9532
		Stage 3	y = 0.001x2 - 0.0542x + 1.0284	R² = 0.9621	y = 0.0006x2 - 0.051x + 1.0594	R² = 0.97
		Stage 4	y = 0.0009x2 - 0.0524x + 0.8157	R² = 0.9712	y = 0.0017x2 - 0.0766x + 0.9198	R² = 0.9856
		Delay
		Source: Cancer.gov data for Massachusetts General Brigham	Start of Pandemic (3/2/20 to 6/2/20)	Previous Year (3/2/19 to 6/2/19)		2020 as a % of 2019
		Patients Screened	15453	60344		0.256082
		Patients Diagnosed with Cancer	1985	2961		0.670382
		Diagnosis as % of screening	0.128454	0.0490687
		Since there is a reduction of 74.4% decrease in the screenings of cancer patients in these three months (March,April,May) we will attribute it to delay in screening
		Also there is 33% decrease in the diagnosed patients
	Observed Incidence Based on Delays
	Female		March	April	May	June
	Stage 1	< 45	1.787	1.74544	1.74544	1.787
	Stage 1	45–54	10.0253	9.79218	9.79218	10.0253
	Stage 1	55–64	40.3145	39.377	39.377	40.3145
	Stage 1	65–74	72.5155	70.8291	70.8291	72.5155
	Stage 1	75–84	54.3118	53.0487	53.0487	54.3118
	Stage 1	85+	19.1393	18.6942	18.6942	19.1393
	Stage 2	< 45	0.595665	0.581812	0.581812	0.595665
	Stage 2	45–54	3.34177	3.26406	3.26406	3.34177
	Stage 2	55–64	13.4382	13.1257	13.1257	13.4382
	Stage 2	65–74	24.1718	23.6097	23.6097	24.1718
	Stage 2	75–84	18.1039	17.6829	17.6829	18.1039
	Stage 2	85+	6.37977	6.23141	6.23141	6.37977
	Stage 3	< 45	1.4147	1.3818	1.3818	1.4147
	Stage 3	45–54	7.93671	7.75214	7.75214	7.93671
	Stage 3	55–64	31.9157	31.1735	31.1735	31.9157
	Stage 3	65–74	57.4081	56.073	56.073	57.4081
	Stage 3	75–84	42.9968	41.9969	41.9969	42.9968
	Stage 3	85+	15.152	14.7996	14.7996	15.152
	Stage 4	< 45	3.49953	3.41815	3.41815	3.49953
	Stage 4	45–54	19.6329	19.1763	19.1763	19.6329
	Stage 4	55–64	78.9493	77.1133	77.1133	78.9493
	Stage 4	65–74	142.01	138.707	138.707	142.01
	Stage 4	75–84	106.361	103.887	103.887	106.361
	Stage 4	85+	37.4812	36.6095	36.6095	37.4812
			808.882	790.07	790.07	808.882
	Male		March	April	May	May
	Stage 1	< 45	1.12798	1.10175	1.10175	1.12798
	Stage 1	45–54	5.98912	5.84983	5.84983	5.98912
	Stage 1	55–64	30.041	29.3424	29.3424	30.041
	Stage 1	65–74	57.3654	56.0313	56.0313	57.3654
	Stage 1	75–84	46.3323	45.2548	45.2548	46.3323
	Stage 1	85+	15.8312	15.463	15.463	15.8312
	Stage 2	< 45	0.501324	0.489665	0.489665	0.501324
	Stage 2	45–54	2.66183	2.59993	2.59993	2.66183
	Stage 2	55–64	13.3516	13.0411	13.0411	13.3516
	Stage 2	65–74	25.4957	24.9028	24.9028	25.4957
	Stage 2	75–84	20.5921	20.1133	20.1133	20.5921
	Stage 2	85+	7.03607	6.87244	6.87244	7.03607
	Stage 3	< 45	1.25331	1.22416	1.22416	1.25331
	Stage 3	45–54	6.65457	6.49982	6.49982	6.65457
	Stage 3	55–64	33.3789	32.6027	32.6027	33.3789
	Stage 3	65–74	63.7393	62.257	62.257	63.7393
	Stage 3	75–84	51.4804	50.2831	50.2831	51.4804									12	13	14	15	16	17	18	19	20	21	22	23	24	25	26	27	28	29	30	31	32	33	34	35	36	37	38	39	40
	Stage 3	85+	17.5902	17.1811	17.1811	17.5902									1	1	1	1	1	1	1	1	1	1	1	1	1	1	1	1	1	1	1	1	1	1	1	1	1	1	1	1	1
															0.85259	0.85259	0.85259	0.85259	0.85259	0.85259	0.85259	0.85259	0.85259	0.85259	0.85259	0.85259	0.85259	0.85259	0.85259
	Stage 4	< 45	3.2586	3.18282	3.18282	3.2586									0.57407	0.57407	0.50617	0.50206	0.50206	0.50206	0.50206	0.50206	0.50206	0.50206	0.5	0.5	0.5	0.5	0.5	0.5	0.5	0.5	0.5	0.5	0.5	0.5	0.5
	Stage 4	45–54	17.3019	16.8995	16.8995	17.3019									0.50206	0.50206	0.50206	0.50206	0.50206	0.49794	0.49794	0.49794	0.49794	0.49794	0.40329	0.40123	0.40123	0.40123	0.40123	0.39712	0.39712	0.26955	0.26955
	Stage 4	55–64	86.7852	84.767	84.767	86.7852									0.59336	0.59336	0.53734	0.36307	0.36307	0.30913	0.30913	0.29876	0.29876	0.29876	0.29876	0.29876	0.29876	0.29876	0.29876	0.29876	0.29876	0.29461	0.29461	0.29461	0.29461	0.29461
	Stage 4	65–74	165.722	161.868	161.868	165.722									0.56224	0.56224	0.5	0.5	0.5	0.42946	0.42946	0.42946	0.21369	0.21369	0.21369	0.10581	0.10581	0.10581	0.10581	0.10581	0.10581	0.10581	0.10581	0.10581	0.10581	0.10581	0.10581	0.10581	0.10581	0.10581	0.10581
	Stage 4	75–84	133.849	130.736	130.736	133.849									0.28008	0.28008	0.28008	0.28008	0.22288	0.22288	0.22288	0.19132	0.12623	0.12623	0.12623	0.12623	0.06114	0.06114	0.06114	0.06114	0.06114	0.06114	0.06114	0.06114	0.06114	0.06114
	Stage 4	85+	45.7345	44.6709	44.6709	45.7345									0.25444	0.19921	0.19724	0.14004	0.14004	0.14004	0.14004	0.08284	0.05523	0.05523	0.02564
			853.074	833.235	833.235	853.074	2413								0.03112	0.03112	0.03734	-0.13693	-0.13693	-0.12033	-0.12033	-0.1307	0.08507	0.08507	0.08507	0.19295	0.19295	0.19295	0.19295	0.19295	0.19295	0.1888	0.1888	0.1888	0.1888	0.1888
		Tablee 3:Total observed incidence and reduced incidence because of delays
	Total Observed Incidence		March	April	May	June
	Stage 1	< 45	2.91497	2.84718	2.84718	2.91497
	Stage 1	45–54	16.0144	15.642	15.642	16.0144
	Stage 1	55–64	70.3556	68.7194	68.7194	70.3556
	Stage 1	65–74	129.881	126.86	126.86	129.881
	Stage 1	75–84	100.644	98.3036	98.3036	100.644
	Stage 1	85+	34.9705	34.1572	34.1572	34.9705
	Stage 2	< 45	1.09699	1.07148	1.07148	1.09699
	Stage 2	45–54	6.0036	5.86398	5.86398	6.0036
	Stage 2	55–64	26.7898	26.1667	26.1667	26.7898
	Stage 2	65–74	49.6676	48.5125	48.5125	49.6676
	Stage 2	75–84	38.6961	37.7962	37.7962	38.6961
	Stage 2	85+	13.4158	13.1038	13.1038	13.4158
	Stage 3	< 45	2.66801	2.60597	2.60597	2.66801
	Stage 3	45–54	14.5913	14.252	14.252	14.5913
	Stage 3	55–64	65.2946	63.7761	63.7761	65.2946
	Stage 3	65–74	121.147	118.33	118.33	121.147
	Stage 3	75–84	94.4772	92.2801	92.2801	94.4772
	Stage 3	85+	32.7421	31.9807	31.9807	32.7421
	Stage 4	< 45	6.75814	6.60097	6.60097	6.75814
	Stage 4	45–54	36.9348	36.0759	36.0759	36.9348
	Stage 4	55–64	165.735	161.88	161.88	165.735
	Stage 4	65–74	307.732	300.575	300.575	307.732
	Stage 4	75–84	240.21	234.623	234.623	240.21
	Stage 4	85+	83.2156	81.2804	81.2804	83.2156
			1661.96	1623.31	1623.31	1661.96
	Reduced Incidence because of delays		March	April	May	May	Total
	Stage 1	< 45	1.43326	1.39992	1.39992	1.43326	5.66636
	Stage 1	45–54	7.8741	7.69098	7.69098	7.8741	31.1302
	Stage 1	55–64	34.593	33.7885	33.7885	34.593	136.763
	Stage 1	65–74	63.8608	62.3757	62.3757	63.8608	252.473
	Stage 1	75–84	49.4855	48.3346	48.3346	49.4855	195.64
	Stage 1	85+	17.1946	16.7947	16.7947	17.1946	67.9785
	Stage 2	< 45	0.539376	0.526832	0.526832	0.539376	2.13242
	Stage 2	45–54	2.9519	2.88325	2.88325	2.9519	11.6703
	Stage 2	55–64	13.1722	12.8659	12.8659	13.1722	52.0761
	Stage 2	65–74	24.4209	23.853	23.853	24.4209	96.5478
	Stage 2	75–84	19.0264	18.5839	18.5839	19.0264	75.2206
	Stage 2	85+	6.59641	6.443	6.443	6.59641	26.0788
	Stage 3	< 45	1.31183	1.28132	1.28132	1.31183	5.1863
	Stage 3	45–54	7.17436	7.00751	7.00751	7.17436	28.3637
	Stage 3	55–64	32.1046	31.3579	31.3579	32.1046	126.925
	Stage 3	65–74	59.5667	58.1814	58.1814	59.5667	235.496
	Stage 3	75–84	46.4533	45.373	45.373	46.4533	183.652
	Stage 3	85+	16.0989	15.7245	15.7245	16.0989	63.6468
	Stage 4	< 45	3.32289	3.24562	3.24562	3.32289	13.137
	Stage 4	45–54	18.1604	17.7381	17.7381	18.1604	71.7969
	Stage 4	55–64	81.4896	79.5945	79.5945	81.4896	322.168
	Stage 4	65–74	151.308	147.789	147.789	151.308	598.194
	Stage 4	75–84	118.108	115.361	115.361	118.108	466.939
	Stage 4	85+	40.9161	39.9646	39.9646	40.9161	161.761
		Reduced Survival Because of Delays
				Months
		Stage	Survival	1	2	3	4	5	6	7	8	9	10	11	12	13	14	15	16	17	18	19	20	21	22	23	24	25	26	27	28	29	30	31	32	33	34	35	36	37	38	39	40
		Stage I	Delay<130 days	1	1	1	1	1	1	1	1	1	1	1	1	1	1	1	1	1	1	1	1	1	1	1	1	1	1	1	1	1	1	1	1	1	1	1	1	1	1	1	1
			Delay>130 days	1	1	0.93426	0.93426	0.93426	0.93426	0.93426	0.93426	0.85458	0.85259	0.85259	0.85259	0.85259	0.85259	0.85259	0.85259	0.85259	0.85259	0.85259	0.85259	0.85259	0.85259	0.85259	0.85259	0.85259	0.85259
		Stage II	Delay<130 days	1	0.86008	0.86008	0.79012	0.79012	0.79012	0.79012	0.72222	0.65021	0.65021	0.64815	0.57407	0.57407	0.50617	0.50206	0.50206	0.50206	0.50206	0.50206	0.50206	0.50206	0.5	0.5	0.5	0.5	0.5	0.5	0.5	0.5	0.5	0.5	0.5	0.5	0.5
			Delay>130 days	1	0.9177	0.91564	0.84156	0.66667	0.66667	0.58848	0.58848	0.50412	0.50206	0.50206	0.50206	0.50206	0.50206	0.50206	0.50206	0.49794	0.49794	0.49794	0.49794	0.49794	0.40329	0.40123	0.40123	0.40123	0.40123	0.39712	0.39712	0.26955	0.26955
		Stage III	Delay<130 days	1	0.94398	0.83402	0.82988	0.71577	0.71162	0.71162	0.64938	0.59336	0.59336	0.59336	0.59336	0.59336	0.53734	0.36307	0.36307	0.30913	0.30913	0.29876	0.29876	0.29876	0.29876	0.29876	0.29876	0.29876	0.29876	0.29876	0.29876	0.29461	0.29461	0.29461	0.29461	0.29461
			Delay>130 days	0.93983	0.93983	0.93983	0.87759	0.87759	0.80913	0.75104	0.74689	0.62656	0.62241	0.56224	0.56224	0.56224	0.5	0.5	0.5	0.42946	0.42946	0.42946	0.21369	0.21369	0.21369	0.10581	0.10581	0.10581	0.10581	0.10581	0.10581	0.10581	0.10581	0.10581	0.10581	0.10581	0.10581	0.10581	0.10581	0.10581	0.10581
		Stage IV	Delay<130 days	0.85602	0.66469	0.66469	0.58777	0.5641	0.48521	0.48521	0.40828	0.32939	0.32939	0.32939	0.28008	0.28008	0.28008	0.28008	0.22288	0.22288	0.22288	0.19132	0.12623	0.12623	0.12623	0.12623	0.06114	0.06114	0.06114	0.06114	0.06114	0.06114	0.06114	0.06114	0.06114	0.06114
			Delay>130 days	0.85602	0.79487	0.68245	0.68245	0.59566	0.51282	0.51282	0.42801	0.36884	0.31164	0.30966	0.25444	0.19921	0.19724	0.14004	0.14004	0.14004	0.14004	0.08284	0.05523	0.05523	0.02564
			Difference in survival because of delays	Months
			Stage	1	2	3	4	5	6	7	8	9	10	11	12	13	14	15	16	17	18	19	20	21	22	23	24	25	26	27	28	29	30	31	32	33	34	35	36	37	38	39	40
			Stage I	0	0	0.06574	0.06574	0.06574	0.06574	0.06574	0.06574	0.14542	0.14741	0.14741	0.14741	0.14741	0.14741	0.14741	0.14741	0.14741	0.14741	0.14741	0.14741	0.14741	0.14741	0.14741	0.14741	0.14741	0.14741	1	1	1	1	1	1	1	1	1	1	1	1	1	1
			Stage II	0	-0.05762	-0.05556	-0.05144	0.12345	0.12345	0.20164	0.13374	0.14609	0.14815	0.14609	0.07201	0.07201	0.00411	0	0	0.00412	0.00412	0.00412	0.00412	0.00412	0.09671	0.09877	0.09877	0.09877	0.09877	0.10288	0.10288	0.23045	0.23045	0.5	0.5	0.5	0.5	0	0	0	0	0	0
			Stage III	0.06017	0.00415	-0.10581	-0.04771	-0.16182	-0.09751	-0.03942	-0.09751	-0.0332	-0.02905	0.03112	0.03112	0.03112	0.03734	-0.13693	-0.13693	-0.12033	-0.12033	-0.1307	0.08507	0.08507	0.08507	0.19295	0.19295	0.19295	0.19295	0.19295	0.19295	0.1888	0.1888	0.1888	0.1888	0.1888	-0.10581	-0.10581	-0.10581	-0.10581	-0.10581	0	0
			Stage IV	0	-0.13018	-0.01776	-0.09468	-0.03156	-0.02761	-0.02761	-0.01973	-0.03945	0.01775	0.01973	0.02564	0.08087	0.08284	0.14004	0.08284	0.08284	0.08284	0.10848	0.071	0.071	0.10059	0.12623	0.06114	0.06114	0.06114	0.06114	0.06114	0.06114	0.06114	0.06114	0.06114	0.06114	0	0	0	0	0	0	0
		Table 4	Overall	10 months period (short term)	20 months (intermediate term)	40 months (long term)
			Stage I	0.14741	0.14741	0.14741
			Stage II	0.14815	0.00412	0.23045
			Stage III	-0.02905	0.08507	0.1888
			Stage IV	0.01775	0.071	0.10059
		Figure 2:
		Stage	# of lives lost due to delay	10 months period (short term)	20 months (intermediate term)	40 months (long term)
		Stage I	< 45	0.835279	0.835279	0.835279
			45–54	4.5889	4.5889	4.5889
			55–64	20.1602	20.1602	20.1602
			65–74	37.217	37.217	37.217
			75–84	28.8393	28.8393	28.8393
			85+	10.0207	10.0207	10.0207
		Stage 2	< 45	0.315917	0.00878555	0.491415
			45–54	1.72895	0.0480816	2.68942
			55–64	7.71508	0.214554	12.0009
			65–74	14.3036	0.397777	22.2494
			75–84	11.1439	0.309909	17.3346
			85+	3.86358	0.107445	6.00986
		Stage 3	< 45	-0.150662	0.441199	0.979174
			45–54	-0.823966	2.4129	5.35507
			55–64	-3.68717	10.7975	23.9634
			65–74	-6.84116	20.0337	44.4617
			75–84	-5.3351	15.6233	34.6736
			85+	-1.84894	5.41444	12.0165
		Stage 4	< 45	0.233182	0.932728	1.32145
			45–54	1.27439	5.09758	7.22205
			55–64	5.71849	22.874	32.4069
			65–74	10.6179	42.4718	60.1723
			75–84	8.28816	33.1527	46.9694		4
			85+	2.87126	11.4851	16.2716
			Total	151.049	273.485	448.25
		Life Years Lost
				Median Age considered
			< 45	28
			45–54	50
			55–64	60
			65–74	70
			75–84	80
			85+	-
			Average Life Expectancy in Canada	82
			Source:World Bank, https://data.worldbank.org/indicator/SP.DYN.LE00.IN?locations=CA
			Years Lost In Each Age Group
			< 45	54
			45–54	32
			55–64	22
			65–74	12
			75–84	2
			85+
	Table 5	Life Years Lost Due To Premature Death		Short Term (10 months)	Intermediate term (20 months)	Long Term (40 months)
			< 45	66.6207	119.772	195.875
			45–54	216.585	388.719	635.374
			55–64	657.946	1189.02	1947.69
			65–74	663.569	1201.44	1969.21
			75–84	85.8726	155.85	255.634
			85+	0	0	0
			Total	1690.59	3054.8	5003.78

## Sheet: sources
Sno.	Title	Abstract	doi	Info 1	Info 1 value	file name
1	Does treatment delay affect survival in non-small cell lung cancer? A retrospective analysis from a single UK centre	We analysed survival in relation both to time to treatment and other clinical parameters in the care pathway of non-small cell lung cancer (NSCLC) patients. Medical notes of 189 patients diagnosed with NSCLC presenting in 1998 were reviewed. Median time to treatment in all patients was 48 days. In multivariate analysis, time to treatment did not affect survival in patients with any stage of disea…	10.1016/s0169-5002(01)00247-1			Bozcuk_2001							Bob	<bjackson@ryerson.ca>
														<bjackson@ryerson.ca>
2	A systematic review and meta-analysis of surgery delays and survival in breast, lung and colon cancers: Implication for surgical triage during the COVID-19 pandemic	Background: Thousands of cancer surgeries were delayed during the peak of the COVID-19 pandemic. This study examines if surgical delays impact survival for breast, lung and colon cancers. Methods: PubMed/MEDLINE, EMBASE, Cochrane Library and Web of Science were searched. Articles evaluating the relationship between delays in surgery and overall survival (OS), disease-free survival (DFS) or cancer…	10.1016/j.lungcan.2006.11.013	HR per 12 week delay(95% confidence interval) lung cancer	1.04	Johnson_2020
3	Seasonal and geographical variations in lung cancer prognosis in Norway: Does Vitamin D from the sun play a role?	Vitamin D derivatives can modulate proliferation and differentiation of cancer cells. Our main source of Vitamin D is ultraviolet (UV) radiation-induced synthesis in skin following sun exposure. UV measurements show that the ambient annual UV exposures increase by about 50% from north to south in Norway. As judged from the incidence rates of squamous cell carcinoma, the same is true for the avera…	10.1016/j.lungcan.2006.11.013	Relative risk with age,sex,area and season		Porojnicua_2006
4	Effect of delays on prognosis in patients with non-small cell lung cancer	Background: The effect of delay on survival in lung cancer remains uncertain. It is suggested that prompt management of non-small cell lung cancer (NSCLC) can influence prognosis. This study was undertaken to examine the relation between delay and prognosis in patients with NSCLC and to investigate the delay time from first symptom and from first hospital visit to start of treatment. Methods: Two…	https://thorax.bmj.com/content/thoraxjnl/59/1/45.full.pd	Symptom to treatment delay and hospital delay		Myrdal_2003
				OS curves
5	Delay and survival in bladder cancer	Objective To assess in detail and evaluate the effect on survival of delays in the diagnosis and treatment of cancer (which might lead to a worse prognosis), dividing the delay from onset of symptoms to first treatment into several components, comprising patient delay, general practitioner (GP) delay, and two or more periods of hospital delay. Patients and methods Data were prospectively collecte…	10.1046/j.1464-410X.2002.02776.x	*this article can be used for the overall approach		Wallace_2002
6	Information Seeking Regarding Tobacco and Lung Cancer: Effects of Seasonality	This paper conducted one of the first comprehensive international Internet analyses of seasonal patterns in information seeking concerning tobacco and lung cancer. Search query data for the terms “tobacco” and “lung cancer” from January 2004 to January 2014 was collected from Google Trends. The relevant countries included the USA, Canada, the UK, Australia, and China. Two statistical approaches i…	10.1371/journal.pone.0117938	Not useful
7	Association of diagnostic delays to survival in lung cancer: single center experience	Background: Rapid diagnostics and treatment approaches have been applied in many countries to enhance patient satisfaction, but it is unknown whether this leads to improvements in survival. Material and methods: Symptoms initiation, referral, and investigations and their timing, and survival were retrospectively collected from all the patients diagnosed for lung cancer at Oulu University Hospital…	https://doi.org/10.1080/0284186X.2019.1590635	survival vs delay curves		Alanen_2019
				Stage HR 1 1 2 12.184 (4.174–35.564) <.00001 3 14.873 (5.231–42.287) <.00001 4 28.162 (10.248–77.393) <.00001
8	Lung cancer survival and stage at diagnosis in Australia, Canada, Denmark, Norway, Sweden and the UK: a population-based study, 2004–2007	ABSTRACT Background The authors consider whether differences in stage at diagnosis could explain the variation in lung cancer survival between six developed countries in 2004–2007. Methods Routinely collected population-based data were obtained on all adults (15–99 years) diagnosed with lung cancer in 2004–2007 and registered in regional and national cancer registries in Australia, Canada, Denmar…	http://dx.doi.org/10.1136/thoraxjnl-2013-203543	One-year net survival (NS, %) overall, age-standardised and age-specific, by stage at diagnosis and country for patients with small cell lung cancer diagnosed during 2004–2007		Walters_2013

## Sheet: 1710000501-eng-female
Population estimates on July 1st, by age and sex 1 2 3 4
Annual
Table: 17-10-0005-01 (formerly CANSIM 051-0001)
Geography: Canada, Province or territory
	Canada
	Females
Age group 3 5	2000	2001	2002	2003	2004	2005	2006	2007	2008	2009	2010	2011	2012	2013	2014	2015	2016	2017	2018	2019	2020
	Persons
All ages	15491918	15654302	15822503	15964718	16113565	16263745	16426415	16590173	16772940	16965482	17157066	17324800	17504322	17681789	17855738	17990107	18192991	18409073	18658841	18914877	19119977
0 to 4 years	874519	856323	841317	831535	830344	830594	839384	853157	874004	892987	912977	926799	936353	939499	941623	942202	949211	947353	946253	941883	936492
5 to 9 years	993237	984620	969963	950572	929999	910001	887847	876503	870429	870876	871126	882489	901853	925856	945996	966354	983263	991248	995151	998264	998650
10 to 14 years	1002745	1014489	1031319	1043013	1045029	1037575	1025117	1007756	989874	971570	952785	931141	921003	917618	922866	926559	941266	956204	978222	997758	1016787
15 to 19 years	1018415	1027634	1033579	1034315	1040749	1056787	1075234	1089626	1101483	1104420	1098911	1090409	1065567	1042464	1024483	1012670	1009025	1014490	1024156	1031314	1026774
20 to 24 years	1009565	1030027	1047380	1064767	1080971	1091380	1098759	1105399	1109909	1122351	1143491	1159133	1169935	1174716	1170249	1150926	1145078	1151100	1165965	1182807	1187455
25 to 29 years	1023432	1020439	1027945	1035890	1051259	1066230	1085322	1105727	1129482	1153909	1172419	1179921	1184211	1184534	1187946	1190201	1201836	1223602	1250045	1272165	1279396
30 to 34 years	1117071	1109732	1103900	1095145	1086222	1082294	1078944	1088063	1103570	1124324	1144355	1166280	1188128	1209632	1225669	1229883	1239172	1248629	1263972	1285925	1311449
35 to 39 years	1334113	1308165	1277585	1234608	1193193	1161519	1149974	1144071	1142051	1139232	1140242	1138492	1151047	1165822	1183797	1197143	1216781	1238035	1265639	1292390	1313248
40 to 44 years	1301404	1326009	1341052	1356042	1367835	1369357	1345529	1308806	1264719	1225300	1195963	1190494	1190224	1188477	1185309	1182711	1181764	1189546	1203513	1223278	1244213
45 to 49 years	1165359	1197789	1235194	1267090	1290133	1310423	1334092	1351375	1370542	1383531	1380836	1350361	1321536	1284569	1251287	1225541	1221090	1215550	1210692	1206950	1204968
50 to 54 years	1025786	1063704	1077360	1098576	1130355	1166887	1200952	1235418	1265892	1290617	1313888	1340989	1359154	1377344	1390545	1390415	1367116	1333934	1293519	1257812	1232050
55 to 59 years	783496	819360	880913	931433	975656	1018725	1055280	1065953	1085345	1114393	1148173	1179504	1220401	1258923	1289088	1314212	1341103	1356256	1372000	1383192	1380219
60 to 64 years	639653	657929	682834	713976	746552	778534	814788	871684	918923	960955	1003392	1036368	1046823	1069420	1102217	1140251	1177183	1215337	1249186	1276958	1300035
65 to 69 years	592084	591873	592209	596919	608920	620019	640242	665000	695014	725384	754710	787301	843134	891949	934364	976717	1011549	1026145	1047723	1080436	1116694
70 to 74 years	546211	550109	554039	556066	556009	555542	556480	557988	563861	576668	590594	610293	629968	656031	682739	708146	740214	797241	846230	890019	932329
75 to 79 years	470473	475809	478432	482173	483053	486257	490152	495067	498777	500289	502028	503266	504878	510427	520864	530742	546213	568011	593747	621481	648607
80 to 84 years	310956	327206	344893	361394	376884	385336	391593	393720	397286	399533	404471	410251	414465	416490	417585	417363	418932	422350	429332	440404	452056
85 to 89 years	186940	191979	196695	199889	203956	214475	229168	242572	254697	266188	272920	277217	281245	285102	287314	290076	295329	300639	304116	306965	308900
90 to 94 years	..	78254	81921	86084	90384	94500	98366	101360	104150	108014	116687	125187	133582	140461	146975	149948	154303	157103	160031	162079	164415
95 to 99 years	..	19850	20742	21862	22595	23735	25455	26982	28713	30461	32253	33811	35211	36566	38334	41404	45319	48831	51527	54210	55879
100 years and over	..	3002	3231	3369	3467	3575	3737	3946	4219	4480	4845	5094	5604	5889	6488	6643	7244	7469	7822	8587	9361
	Years
Median age	37.7	38.1	38.5	38.9	39.2	39.6	39.9	40.1	40.3	40.4	40.6	40.8	41	41.2	41.4	41.6	41.7	41.8	41.8	41.8	41.9
Symbol legend:
..	not available for a specific reference period
Footnotes:
1	Postcensal estimates are based on the 2016 Census counts adjusted for census net undercoverage (CNU) (including adjustment for incompletely enumerated Indian reserves (IEIR)) and the components of demographic growth that occurred since that census. Intercensal estimates are produced using counts from two consecutive censuses adjusted for CNU (including (IEIR) and postcensal estimates.
2	Estimates are final intercensal up to 2015, final postcensal from 2016 to 2018, updated postcensal for 2019 and preliminary postcensal for 2020.
3	Data for persons aged 90 to 100 years and over will be available from 2001.
4	The population growth, which is used to calculate population estimates, is comprised of the natural growth (Tables 17100006 and 17100016), international migration (Table 17100014) and interprovincial migration (Table 17100015).
5	Age at last birthday in years.
How to cite: Statistics Canada. Table 17-10-0005-01 Population estimates on July 1st, by age and sex
https://www150.statcan.gc.ca/t1/tbl1/en/tv.action?pid=1710000501
DOI: https://doi.org/10.25318/1710000501-eng

## Sheet: 1710000501-eng-males
Population estimates on July 1st, by age and sex 1 2 3 4
Annual
Table: 17-10-0005-01 (formerly CANSIM 051-0001)
Geography: Canada, Province or territory
	Canada
	Males
Age group 3 5	2000	2001	2002	2003	2004	2005	2006	2007	2008	2009	2010	2011	2012	2013	2014	2015	2016	2017	2018	2019	2020
	Persons
All ages	15193812	15366600	15537576	15679310	15827090	15980008	16144759	16298852	16474178	16663413	16847823	17014528	17209900	17401165	17581697	17712801	17916496	18136222	18406337	18678507	18885261
0 to 4 years	916180	898031	881975	873741	874686	877651	888125	900318	919548	938644	958928	973013	980985	985155	986082	986676	993580	994520	994308	990580	985452
5 to 9 years	1043712	1032429	1018791	997085	975051	954781	936688	925431	920060	920911	920043	928425	945652	966874	985043	1003138	1019960	1030316	1038162	1042768	1045953
10 to 14 years	1053098	1065250	1083427	1096137	1096803	1086955	1071000	1058155	1042424	1025166	1006314	986954	974448	969050	970398	968904	978544	992477	1014167	1035230	1055313
15 to 19 years	1077494	1088281	1094685	1095603	1103402	1119372	1136295	1142457	1149464	1151361	1149965	1145788	1132074	1112409	1094406	1080291	1074818	1076108	1082239	1083225	1074091
20 to 24 years	1058812	1078970	1094908	1113265	1129998	1142940	1152981	1155932	1154716	1163650	1178481	1193322	1220026	1241717	1252785	1244697	1242113	1250319	1270494	1292739	1295347
25 to 29 years	1050780	1052680	1057727	1062820	1073774	1084867	1099354	1118900	1143370	1168019	1184964	1188376	1199716	1209043	1225550	1239356	1264270	1290055	1325044	1353893	1365844
30 to 34 years	1136367	1130642	1127602	1119906	1108478	1099816	1092313	1094111	1103818	1121021	1138881	1159976	1179945	1202017	1222168	1230618	1249488	1266458	1289327	1319176	1350274
35 to 39 years	1354673	1330955	1300743	1255674	1214103	1184813	1172793	1163066	1157914	1148824	1142061	1133933	1140950	1151645	1165475	1174086	1193244	1217891	1251700	1288783	1317432
40 to 44 years	1299531	1329876	1350625	1369714	1386921	1390861	1370062	1332425	1283966	1240231	1207096	1195287	1191249	1186258	1177103	1167211	1160414	1164185	1178063	1198765	1220034
45 to 49 years	1150069	1181591	1220971	1257196	1284695	1310010	1338471	1360297	1384258	1401175	1399339	1369619	1336245	1292960	1252324	1220275	1210028	1202542	1196875	1190901	1185148
50 to 54 years	1018908	1053763	1064112	1081165	1110602	1146838	1182039	1222813	1261673	1292908	1320504	1350060	1367055	1383470	1396037	1392935	1367448	1330959	1286609	1246625	1217865
55 to 59 years	772497	809433	869072	916701	957289	997634	1032647	1045863	1067306	1099729	1137887	1173395	1211390	1249247	1277271	1300456	1324747	1340431	1356012	1368185	1364677
60 to 64 years	613561	630932	655716	687348	720207	752916	788278	844340	891262	933466	977853	1013565	1023315	1041252	1069392	1102960	1135977	1172722	1208304	1236748	1260206
65 to 69 years	549891	550143	548769	552422	562749	574224	594873	619639	649039	679231	709616	744664	801443	849102	888164	926287	957632	969894	988509	1017348	1050581
70 to 74 years	458814	469449	479207	484531	487565	488185	489997	491123	497659	510213	524094	542589	564079	592170	621283	649566	682973	736101	779387	817561	854293
75 to 79 years	334440	343126	350520	360152	368094	377188	387233	396494	403051	407556	411363	415677	420270	428838	440683	452282	468088	489682	515941	543317	569696
80 to 84 years	184430	195937	209371	221920	233940	243248	251773	257076	264613	271555	280606	290476	299922	307258	313199	317644	323647	329295	337170	348047	359314
85 to 89 years	88469	91989	94427	96618	99378	106013	115731	124422	131926	139420	144979	149290	155870	163301	170273	177089	185348	193051	199663	205031	208810
90 to 94 years	..	27526	29098	31073	32911	34902	36733	38237	39662	41306	45009	49852	54454	58076	61862	64978	68987	72577	76477	80215	84178
95 to 99 years	..	5077	5297	5682	5851	6180	6677	7016	7605	8151	8943	9327	9752	10156	10962	12084	13791	15106	16251	17577	18597
100 years and over	..	520	533	557	593	614	696	737	844	876	897	940	1060	1167	1237	1268	1399	1533	1635	1793	2156
	Years
Median age	36	36.4	36.7	37.1	37.4	37.7	38	38.3	38.5	38.7	38.9	39.1	39.3	39.4	39.5	39.7	39.8	39.8	39.7	39.7	39.8
Symbol legend:
..	not available for a specific reference period
Footnotes:
1	Postcensal estimates are based on the 2016 Census counts adjusted for census net undercoverage (CNU) (including adjustment for incompletely enumerated Indian reserves (IEIR)) and the components of demographic growth that occurred since that census. Intercensal estimates are produced using counts from two consecutive censuses adjusted for CNU (including (IEIR) and postcensal estimates.
2	Estimates are final intercensal up to 2015, final postcensal from 2016 to 2018, updated postcensal for 2019 and preliminary postcensal for 2020.
3	Data for persons aged 90 to 100 years and over will be available from 2001.
4	The population growth, which is used to calculate population estimates, is comprised of the natural growth (Tables 17100006 and 17100016), international migration (Table 17100014) and interprovincial migration (Table 17100015).
5	Age at last birthday in years.
How to cite: Statistics Canada. Table 17-10-0005-01 Population estimates on July 1st, by age and sex
https://www150.statcan.gc.ca/t1/tbl1/en/tv.action?pid=1710000501
DOI: https://doi.org/10.25318/1710000501-eng

## Sheet: 1710000501-eng-total
Population estimates on July 1st, by age and sex 1 2 3 4
Annual
Table: 17-10-0005-01 (formerly CANSIM 051-0001)
Geography: Canada, Province or territory
	Canada
	Both sexes
Age group 3 5	2000	2001	2002	2003	2004	2005	2006	2007	2008	2009	2010	2011	2012	2013	2014	2015	2016	2017	2018	2019	2020
	Persons
All ages	30685730	31020902	31360079	31644028	31940655	32243753	32571174	32889025	33247118	33628895	34004889	34339328	34714222	35082954	35437435	35702908	36109487	36545295	37065178	37593384	38005238
0 to 4 years	1790699	1754354	1723292	1705276	1705030	1708245	1727509	1753475	1793552	1831631	1871905	1899812	1917338	1924654	1927705	1928878	1942791	1941873	1940561	1932463	1921944
5 to 9 years	2036949	2017049	1988754	1947657	1905050	1864782	1824535	1801934	1790489	1791787	1791169	1810914	1847505	1892730	1931039	1969492	2003223	2021564	2033313	2041032	2044603
10 to 14 years	2055843	2079739	2114746	2139150	2141832	2124530	2096117	2065911	2032298	1996736	1959099	1918095	1895451	1886668	1893264	1895463	1919810	1948681	1992389	2032988	2072100
15 to 19 years	2095909	2115915	2128264	2129918	2144151	2176159	2211529	2232083	2250947	2255781	2248876	2236197	2197641	2154873	2118889	2092961	2083843	2090598	2106395	2114539	2100865
20 to 24 years	2068377	2108997	2142288	2178032	2210969	2234320	2251740	2261331	2264625	2286001	2321972	2352455	2389961	2416433	2423034	2395623	2387191	2401419	2436459	2475546	2482802
25 to 29 years	2074212	2073119	2085672	2098710	2125033	2151097	2184676	2224627	2272852	2321928	2357383	2368297	2383927	2393577	2413496	2429557	2466106	2513657	2575089	2626058	2645240
30 to 34 years	2253438	2240374	2231502	2215051	2194700	2182110	2171257	2182174	2207388	2245345	2283236	2326256	2368073	2411649	2447837	2460501	2488660	2515087	2553299	2605101	2661723
35 to 39 years	2688786	2639120	2578328	2490282	2407296	2346332	2322767	2307137	2299965	2288056	2282303	2272425	2291997	2317467	2349272	2371229	2410025	2455926	2517339	2581173	2630680
40 to 44 years	2600935	2655885	2691677	2725756	2754756	2760218	2715591	2641231	2548685	2465531	2403059	2385781	2381473	2374735	2362412	2349922	2342178	2353731	2381576	2422043	2464247
45 to 49 years	2315428	2379380	2456165	2524286	2574828	2620433	2672563	2711672	2754800	2784706	2780175	2719980	2657781	2577529	2503611	2445816	2431118	2418092	2407567	2397851	2390116
50 to 54 years	2044694	2117467	2141472	2179741	2240957	2313725	2382991	2458231	2527565	2583525	2634392	2691049	2726209	2760814	2786582	2783350	2734564	2664893	2580128	2504437	2449915
55 to 59 years	1555993	1628793	1749985	1848134	1932945	2016359	2087927	2111816	2152651	2214122	2286060	2352899	2431791	2508170	2566359	2614668	2665850	2696687	2728012	2751377	2744896
60 to 64 years	1253214	1288861	1338550	1401324	1466759	1531450	1603066	1716024	1810185	1894421	1981245	2049933	2070138	2110672	2171609	2243211	2313160	2388059	2457490	2513706	2560241
65 to 69 years	1141975	1142016	1140978	1149341	1171669	1194243	1235115	1284639	1344053	1404615	1464326	1531965	1644577	1741051	1822528	1903004	1969181	1996039	2036232	2097784	2167275
70 to 74 years	1005025	1019558	1033246	1040597	1043574	1043727	1046477	1049111	1061520	1086881	1114688	1152882	1194047	1248201	1304022	1357712	1423187	1533342	1625617	1707580	1786622
75 to 79 years	804913	818935	828952	842325	851147	863445	877385	891561	901828	907845	913391	918943	925148	939265	961547	983024	1014301	1057693	1109688	1164798	1218303
80 to 84 years	495386	523143	554264	583314	610824	628584	643366	650796	661899	671088	685077	700727	714387	723748	730784	735007	742579	751645	766502	788451	811370
85 to 89 years	275409	283968	291122	296507	303334	320488	344899	366994	386623	405608	417899	426507	437115	448403	457587	467165	480677	493690	503779	511996	517710
90 to 94 years	..	105780	111019	117157	123295	129402	135099	139597	143812	149320	161696	175039	188036	198537	208837	214926	223290	229680	236508	242294	248593
95 to 99 years	..	24927	26039	27544	28446	29915	32132	33998	36318	38612	41196	43138	44963	46722	49296	53488	59110	63937	67778	71787	74476
100 years and over	..	3522	3764	3926	4060	4189	4433	4683	5063	5356	5742	6034	6664	7056	7725	7911	8643	9002	9457	10380	11517
	Years
Median age	36.8	37.2	37.6	38	38.3	38.6	38.9	39.2	39.4	39.6	39.8	40	40.1	40.3	40.5	40.7	40.7	40.8	40.8	40.8	40.9
Symbol legend:
..	not available for a specific reference period
Footnotes:
1	Postcensal estimates are based on the 2016 Census counts adjusted for census net undercoverage (CNU) (including adjustment for incompletely enumerated Indian reserves (IEIR)) and the components of demographic growth that occurred since that census. Intercensal estimates are produced using counts from two consecutive censuses adjusted for CNU (including (IEIR) and postcensal estimates.
2	Estimates are final intercensal up to 2015, final postcensal from 2016 to 2018, updated postcensal for 2019 and preliminary postcensal for 2020.
3	Data for persons aged 90 to 100 years and over will be available from 2001.
4	The population growth, which is used to calculate population estimates, is comprised of the natural growth (Tables 17100006 and 17100016), international migration (Table 17100014) and interprovincial migration (Table 17100015).
5	Age at last birthday in years.
How to cite: Statistics Canada. Table 17-10-0005-01 Population estimates on July 1st, by age and sex
https://www150.statcan.gc.ca/t1/tbl1/en/tv.action?pid=1710000501
DOI: https://doi.org/10.25318/1710000501-eng

## Sheet: Sheet2
	Values	Frequency	Percentage
	January	2508614	0.088		0.0875923
	February	2230127	0.078
	March	2448825	0.086
	April	2391715	0.084
	May	2414610	0.084
	June	2473700	0.086
	July	2340205	0.082
	August	2424414	0.085
	September	2300189	0.08
	October	2447572	0.085
	November	2250629	0.079
	December	2217930	0.077
	Blank(s)	191122	0.007
		28639652

## Sheet: SurvivalVSTime
	Alanen_2019		Figure 1. Kaplan–Meier survival analysis according to stage at the time of diagnosis (n¼221). Crosses mark censored events
	Stage 1		Stage 2		stage 3		stage 4
	x	y	x	y	x	y	x	y
	0	0.997041	0	0.997041	0	0.973373	0	0.973373
	2.02381	0.997041	2.02381	0.997041	1.07143	0.95858	0.0608681	0.944742
	3.09524	0.97929	3.21429	0.890533	1.07143	0.943787	0.457696	0.848589
	4.04762	0.97929	4.28571	0.863905	2.14286	0.931953	1.05294	0.823934
	5	0.97929	4.64286	0.831361	3.03571	0.863166	1.25135	0.757366
	6.07143	0.97929	5.35714	0.751479	4.375	0.840976	1.9458	0.7549
	7.14286	0.97929	6.07143	0.751479	5	0.823225	2.34262	0.680936
	8.09524	0.940828	7.14286	0.751479	5.89286	0.79216	3.03707	0.676005
	9.16667	0.940828	8.21429	0.66568	6.875	0.76997	3.43389	0.653815
	10.4762	0.93787	9.16667	0.621302	8.03571	0.698965	4.02913	0.653815
	11.4286	0.93787	10.1191	0.579882	8.92857	0.683432	4.52517	0.599575
	12.2619	0.93787	11.1905	0.526627	9.82143	0.639053	4.92199	0.599575
	12.9762	0.93787	12.381	0.5	11.0714	0.639053	5.31882	0.557662
	14.0476	0.93787	13.2143	0.5	12.2321	0.590237	6.21168	0.552731
	14.881	0.93787	13.9286	0.5	13.2143	0.570266	6.41009	0.518214
	15.7143	0.93787	14.881	0.470414	15.0893	0.503698	7.10454	0.518214
	17.381	0.93787	16.4286	0.470414	16.1607	0.423817	7.50137	0.476301
	18.3333	0.93787	17.1	0.470414	17.0536	0.39497	8.0966	0.473835
	19.0476	0.93787	18.2143	0.470414	17.5	0.366124	8.39423	0.414663
	19.7619	0.93787	19.1667	0.470414	18.9286	0.366124	8.98946	0.412198
	20.5952	0.93787	20	0.470414	20.0893	0.33284	9.4855	0.34563
	21.5476	0.93787	21.1905	0.420118	20.3571	0.27071	10.7752	0.343165
	23.4524	0.93787	22.2619	0.420118	22.0536	0.27071	11.4696	0.313579
	24.4048	0.93787	23.0952	0.420118	22.6786	0.224112	12.1641	0.311113
	25.3571	0.93787	23.6905	0.420118	24.1071	0.224112	12.4617	0.298786
	26.0714	0.93787	24.4048	0.420118	25.625	0.224112	13.553	0.264269
	27.1429	0.89645	25.1191	0.420118	27.1429	0.224112	14.049	0.264269
	27.9762	0.89645	25.7143	0.41716	28.3929	0.224112	14.3466	0.24208
	28.9286	0.89645	27.1429	0.41716	30.2679	0.224112	14.9419	0.24208
	29.881	0.89645	27.9762	0.411243	31.875	0.224112	15.6363	0.24208
	31.3095	0.89645	28.8095	0.35503	32.9464	0.224112	16.0331	0.24208
	32.1429	0.89645	30.1191	0.349112	34.2857	0.224112	16.6284	0.21989
	32.9762	0.89645	31.1905	0.349112	35.7753	0.224112	17.6204	0.21989
	33.8095	0.893491	32.381	0.349112	37.0649	0.224112	18.6125	0.21989
	34.6429	0.893491	32.9762	0.349112			19.307	0.177977
	35.5952	0.893491	34.2857	0.349112			19.9022	0.175512
	36.3095	0.893491	35.4762	0.349112			20.3982	0.123736
	37.2619	0.893491	36.0714	0.349112			20.9935	0.121271
	37.9762	0.893491	37.0238	0.349112			21.2911	0.106478
	38.9286	0.893491					21.8863	0.106478
							22.4816	0.0916852
							22.8784	0.0916852
							23.2752	0.0793578
							24.1681	0.0768923
							24.5649	0.059634
							26.053	0.059634
							26.7475	0.059634
							28.7316	0.059634
							29.8229	0.059634
							30.8149	0.059634
							31.9062	0.059634
		Referral to diagnosis >33 days		Diagnosis to treatment >27 days
	Stage	HR (95% CI)	p-value	HR (95% CI)	p-value
	1	1		1
	2	7.327(2.406–22.312)	0.0005	7.173(2.378–21.633)	0.0005
	3	8.39(2.845–24.741)	0.0001	8.779(2.999–25.696)	7e-05
	4	11.834(4.062–34.480)	<.00001	13.976(4.843–40.279)	1e-05

## Sheet: delay data
Cancer Network		https://www.cancernetwork.com/view/delay-in-cancer-screening-and-diagnosis-during-the-covid-19-pandemic-what-is-the-cost
PR Newswire; New York		https://search-proquest-com.ezproxy.lib.ryerson.ca/docview/2414406344?pq-origsite=summon
Disruption of cancer care in Canada during COVID-19 - The Lancet Oncology
Cancer Treatment Wait Times in Canada (ctoam.com)		(56% of patients wait more than four weeks; the international average is 36%.)
• Wait time for cancer surgery by type Canada 2019 | Statista		lung 2015: 48 days	lung 2019 :50 days
https://www.cancer.gov/news-events/cancer-currents-blog/2021/cancer-screening-decreases-coronavirus-pandemic			Start of Pandemic (3/2/20 to 6/2/20)	Previous Year (3/2/19 to 6/2/19)	Preceding 3 Months (12/1/19 to 3/2/20)	Subsequent 3 Months (6/3/20 to 9/3/20)
		Patients Screened	15453	60344	64269	51944
		Patients Diagnosed with Cancer	1985	2961	3423	3190
		In March 2020 alone, COVID-19 forced the postponement of more than 800 appointments for lung cancer screening. But when screening fully resumed on June 1, the percentage of people tested who had lung nodules that were suspicious for cancer had increased from 8% before the pandemic to 29%, the researchers found.
Oncologist fears 'tsunami of cancer' after COVID-19 lockdowns limited screening | CBC News		During the first wave of the pandemic — from March 15 to May 31 — there was a significant decrease in screening for three major cancers in Ontario compared to the same period in 2019, according to Ontario Health:
		A 97 per cent decrease in screening for mammograms through the Ontario Breast Screening Program.
		An 88 per cent decrease in Pap tests through the Ontario Cervical Screening Program.
		A 73 per cent decrease in fecal tests through ColonCancerCheck.

## Sheet: Survival 
	Stage 1				Stage 2				Stage 3				Stage 4
	<130days		130days>		<130days		>130days		<130days		>130days		<130days		>130days
	x	y	x	y	x	y	x	y	x	y	x	y	x	y	x	y
0	0	1	0	1	0.07421	1	0.07421	1	0	1	0	0.99793	0	1	0	1
1	1	1	0.75342	1	1.18738	1	0.89054	1	0.93933	1	1.09589	0.93983	0.81031	0.85602	0.95764	0.85602
2	2	1	1.84932	1	2.07792	0.86008	2.15213	0.9177	1.95695	0.94398	2.1135	0.93983	2.06262	0.66469	1.98895	0.79487
3	3	1	2.19178	0.93426	2.96846	0.86008	3.33952	0.91564	3.13112	0.83402	2.818	0.93983	3.09392	0.66469	3.24125	0.68245
4	4	1	2.94521	0.93426	4.15584	0.79012	4.00742	0.84156	4.69667	0.82988	4.30528	0.87759	4.12523	0.58777	3.9779	0.68245
5	5	1	3.69863	0.93426	5.26902	0.79012	5.04638	0.66667	5.24462	0.71577	5.16634	0.87759	5.15654	0.5641	5.00921	0.59566
6	6	1	4.31507	0.93426	6.23377	0.79012	6.15955	0.66667	6.34051	0.71162	6.0274	0.80913	6.18785	0.48521	6.18785	0.51282
7	7	1	5.75342	0.93426	7.64378	0.79012	7.27273	0.58848	6.88845	0.71162	7.12329	0.75104	7.29282	0.48521	6.92449	0.51282
8	8	1	6.71233	0.93426	8.23748	0.72222	7.94063	0.58848	7.90607	0.64938	8.06262	0.74689	8.1768	0.40828	8.02947	0.42801
9	9	1	7.46575	0.85458	9.20223	0.65021	9.0538	0.50412	8.92368	0.59336	8.92368	0.62656	9.13444	0.32939	9.06077	0.36884
10	10	1	8.35616	0.85259	9.87013	0.65021	9.79592	0.50206	9.5499	0.59336	9.94129	0.62241	9.87109	0.32939	10.2394	0.31164
11	11	1	9.93151	0.85259	10.8349	0.64815	11.2059	0.50206	11.4286	0.59336	11.272	0.56224	11.0497	0.32939	10.9024	0.30966
12	12	1	11.6438	0.85259	11.9481	0.57407	12.0965	0.50206	12.4462	0.59336	12.1331	0.56224	12.1547	0.28008	12.523	0.25444
13	13	1	12.9452	0.85259	13.0612	0.57407	13.0612	0.50206	13.0724	0.59336	12.9941	0.56224	13.186	0.28008	13.2597	0.19921
14	14	1	14.0411	0.85259	14.3228	0.50617	14.026	0.50206	14.3248	0.53734	14.3248	0.5	14.291	0.28008	13.9963	0.19724
15	15	1	15.7534	0.85259	15.0649	0.50206	15.1392	0.50206	15.1076	0.36307	15.2642	0.5	14.954	0.28008	15.3959	0.14004
16	16	1	17.3288	0.85259	15.8071	0.50206	15.8813	0.50206	16.2035	0.36307	15.8121	0.5	16.2799	0.22288	16.2799	0.14004
17	17	1	19.1096	0.85259	16.846	0.50206	16.9202	0.49794	17.0646	0.30913	17.2994	0.42946	16.8692	0.22288	17.0902	0.14004
18	18	1	20.7534	0.85259	17.9592	0.50206	18.4787	0.49794	17.8474	0.30913	18.2387	0.42946	18.1952	0.22288	18.0479	0.14004
19	19	1	22.9452	0.85259	18.9239	0.50206	18.9981	0.49794	19.1781	0.29876	18.9432	0.42946	19.1529	0.19132	19.1529	0.08284
20	20	1	24.1781	0.85259	19.8145	0.50206	19.8145	0.49794	20.274	0.29876	20.274	0.21369	20.2578	0.12623	20.1842	0.05523
21	21	1	25.411	0.85259	21.2245	0.50206	20.8534	0.49794	21.0568	0.29876	20.9785	0.21369	20.9208	0.12623	20.9208	0.05523
22	22	1	26.3699	0.85259	21.8182	0.5	21.8924	0.40329	21.7613	0.29876	21.9178	0.21369	22.4678	0.12623	21.7311	0.02564
23	23	1	27.3288	0.85259	23.0798	0.5	23.154	0.40123	23.092	0.29876	23.5616	0.10581	22.9098	0.12623
24	24	1	28.5616	0.85259	24.3414	0.5	23.8961	0.40123	24.1096	0.29876	24.501	0.10581	24.2357	0.06114
25	25	1	30.137	0.85259	25	0.5	25.0835	0.40123	25.362	0.29876	25.4403	0.10581	25.046	0.06114
26	26	1	30.8904	0.85259	25.8256	0.5	26.1225	0.40123	26.5362	0.29876	26.3797	0.10581	26.0037	0.06114
27	27	1			27.6809	0.5	27.1614	0.39712	27.7104	0.29876	27.2407	0.10581	27.477	0.06114
28	28	1			28.2746	0.5	27.9035	0.39712	0.39712	0.29876	28.1018	0.10581	28.2136	0.06114
29	29	1			29.462	0.5	29.2393	0.26955	29.9804	0.29461	29.0411	0.10581	28.8766	0.06114
30	30	1			30.7978	0.5	29.833	0.26955	0.26955	0.29461	29.8239	0.10581	30	0.06114
31	31	1			32.8015	0.5			31.1546	0.29461	31.6243	0.10581	31	0.06114
32	32	1			34.1373	0.5			32.1722	0.29461	32	0.10581	32	0.06114
33	33	1			35.6215	0.5			32.7202	0.29461	32.7984	0.10581	33	0.06114
34	34	1			36.6605	0.5					33.816	0.10581
35	35	1									35	0.10581
36	36	1									36	0.10581
37	37	1									37	0.10581
38	38	1									38	0.10581
39	39	1
40	40	1
